# Supplementary material for: Impact of androgen deprivation therapy on apparent diffusion coefficient and T2w MRI for histogram and texture analysis with respect to focal radiotherapy of prostate cancer
Source: PubMed Central journal article supplement (PMC6488548; doi:10.1007/s00066-018-1402-3), 2018-11-26
Supplement: 66_2018_1402_MOESM1_ESM.pdf [file 66_2018_1402_MOESM1_ESM.pdf]

**Table S1** Details on T2w and ADC scanning protocols of each patient.

| Group  | Patient Information |     |                  |               | Scanner Details |         |                | T2w sequence (tse, transversal) |                   |                   |        |        |         | ADC sequence (2D ep spair, transversal) |                     |                   |                   |        |        |         |
|--------|---------------------|-----|------------------|---------------|-----------------|---------|----------------|---------------------------------|-------------------|-------------------|--------|--------|---------|-----------------------------------------|---------------------|-------------------|-------------------|--------|--------|---------|
|        | ID                  | Age | ADT duration [m] | Gleason Score | Machine         | Vendor  | Field Strength | T2w Slice Thickness             | T2w Slice Spacing | T2w Pixel Spacing | T2w TR | T2w TE | T2w NoA | b Values                                | ADC Slice Thickness | ADC Slice Spacing | ADC Pixel Spacing | ADC TR | ADC TE | ADC NoA |
| ADT    | 1                   | 56  | 7                | 4+4=8         | Biograph_mMR    | Siemens | 3              | 3                               | 3.6               | 0.625             | 3200   | 101    | 3       | 0/800<br>/1400                          | 3.6                 | 3.6               | 1.238             | 5300   | 92     | 6       |
|        | 2                   | 73  | 7                | 4+3=7         | Biograph_mMR    | Siemens | 3              | 3                               | 3.6               | 0.521             | 4000   | 104    | 3       | 0/800<br>/1400                          | 3.8                 | 3.8               | 1.238             | 5300   | 92     | 6       |
|        | 3                   | 74  | 3                | 4+3=7         | Biograph_mMR    | Siemens | 3              | 3                               | 3.6               | 0.750             | 4000   | 101    | 3       | 0/850                                   | 3.6                 | 3.6               | 1.458             | 3800   | 56     | 2       |
|        | 4                   | 77  | 1                | 4+5=9         | Biograph_mMR    | Siemens | 3              | 3                               | 3.6               | 0.625             | 4000   | 101    | 3       | 0/800<br>/1400                          | 3.6                 | 3.6               | 1.238             | 5300   | 92     | 6       |
|        | 5                   | 54  | 118              | 4+5=9         | Espreo          | Siemens | 1.5            | 3                               | 3.3               | 0.521             | 3880   | 113    | 2       | 50/1000<br>/1400                        | 6                   | 6.6               | 1.979             | 2000   | 95     | 2       |
|        | 6                   | 65  | 1                | 4+4=8         | Ingenia         | Philips | 3              | 3.3                             | 3.63              | 0.341             | 4000   | 110    | 1       | 0/600<br>/1200                          | 5                   | 5.5               | 1.420             | 4300   | 80     | 3       |
|        | 7                   | 63  | 104              | 3+3=6         | TrioTim         | Siemens | 3              | 3                               | 3.6               | 0.625             | 4000   | 101    | 3       | 0/100/400<br>/800/1600(calc)            | 3.6                 | 3.6               | 1.625             | 3300   | 60     | 8       |
|        | 8                   | 73  | 70               | 3+4=7         | TrioTim         | Siemens | 3              | 3                               | 3.6               | 0.625             | 4000   | 101    | 3       | 0/100/400<br>/800/1600(calc)            | 3.6                 | 3.6               | 1.625             | 3300   | 60     | 8       |
|        | 9                   | 71  | 33               | 5+4=9         | TrioTim         | Siemens | 3              | 3                               | 3.6               | 0.625             | 4000   | 101    | 3       | 0/100/400<br>/800/1600(calc)            | 3.6                 | 3.6               | 1.625             | 3300   | 60     | 8       |
|        | 10                  | 76  | 4                | 4+5=9         | TrioTim         | Siemens | 3              | 3                               | 3.6               | 0.625             | 4000   | 101    | 3       | 0/100/400<br>/800/1600(calc)            | 3.6                 | 3.6               | 1.625             | 3300   | 60     | 8       |
|        | 11                  | 80  | 3                | 3+4=7         | TrioTim         | Siemens | 3              | 3                               | 3.6               | 0.625             | 4000   | 101    | 3       | 0/100/400<br>/800/1600(calc)            | 3.6                 | 3.6               | 1.625             | 3300   | 60     | 8       |
|        | 12                  | 67  | 2                | 4+3=7         | TrioTim         | Siemens | 3              | 3                               | 3.6               | 0.625             | 4000   | 101    | 3       | 0/100/400<br>/800/1600(calc)            | 3.6                 | 3.6               | 1.625             | 3300   | 60     | 8       |
|        | 13                  | 72  | 2                | 4+3=7         | TrioTim         | Siemens | 3              | 3                               | 3.6               | 0.625             | 4000   | 101    | 3       | 0/100/400<br>/800/1600(calc)            | 3.6                 | 3.6               | 1.625             | 3300   | 60     | 8       |
|        | 14                  | 76  | 1                | 3+4=7         | TrioTim         | Siemens | 3              | 3                               | 3.6               | 0.625             | 4000   | 101    | 3       | 0/100/800<br>/1600(calc)                | 3.6                 | 3.6               | 1.625             | 3300   | 60     | 8       |
| no-ADT | 15                  | 75  |                  | 4+5=9         | Biograph mMR    | Siemens | 3              | 3                               | 3.6               | 0.703             | 4000   | 108    | 3       | 0/850                                   | 3.6                 | 3.6               | 1.771             | 6400   | 56     | 2       |
|        | 16                  | 71  |                  | 4+4=8         | Biograph mMR    | Siemens | 3              | 3                               | 3.6               | 0.521             | 4000   | 104    | 3       | 0/50<br>/850                            | 3.6                 | 3.6               | 1.625             | 5400   | 93     | 8       |
|        | 17                  | 67  |                  | 4+4=8         | Biograph mMR    | Siemens | 3              | 3                               | 3.6               | 0.521             | 6160   | 104    | 3       | 0/100<br>/850                           | 3.6                 | 3.6               | 1.625             | 7426   | 93     | 8       |
|        | 18                  | 66  |                  | 3+3=6         | Biograph mMR    | Siemens | 3              | 3                               | 3.6               | 0.625             | 4000   | 101    | 3       | 0/800<br>/1400                          | 3.6                 | 3.8               | 1.238             | 5300   | 92     | 6       |
|        | 19                  | 64  |                  | 3+4=7         | Skyra           | Siemens | 3              | 2.5                             | 2.5               | 0.625             | 6650   | 105    | 3       | 50/800<br>/1600                         | 2.5                 | 2.5               | 1.864             | 5540   | 59     | 2       |
|        | 20                  | 65  |                  | 3+3=6         | Skyra           | Siemens | 3              | 2.5                             | 2.5               | 0.625             | 6650   | 105    | 3       | 50/800<br>/1600                         | 2.5                 | 2.5               | 1.864             | 5540   | 59     | 2       |
|        | 21                  | 73  |                  | 3+4=7         | TrioTim         | Siemens | 3              | 3                               | 3.6               | 0.625             | 4000   | 101    | 3       | 0/100/400<br>/800/1600(calc)            | 3.6                 | 3.6               | 1.625             | 3300   | 60     | 8       |
|        | 22                  | 75  |                  | 4+4=8         | TrioTim         | Siemens | 3              | 3                               | 3.6               | 0.625             | 4000   | 101    | 3       | 0/100/400<br>/800/1600(calc)            | 3.6                 | 3.6               | 1.625             | 3300   | 60     | 8       |
|        | 23                  | 68  |                  | 3+4=7         | TrioTim         | Siemens | 3              | 3                               | 3.6               | 0.625             | 4000   | 101    | 3       | 0/100/400<br>/800/1600(calc)            | 3.6                 | 3.6               | 1.625             | 3300   | 60     | 8       |
|        | 24                  | 79  |                  | 4+5=9         | TrioTim         | Siemens | 3              | 3                               | 3.6               | 0.625             | 4000   | 101    | 3       | 0/100/400<br>/800/1600(calc)            | 3.6                 | 3.6               | 1.625             | 3300   | 60     | 8       |
|        | 25                  | 79  |                  | 5+4=9         | TrioTim         | Siemens | 3              | 3                               | 3.6               | 0.625             | 4000   | 101    | 3       | 0/100/400<br>/800/1600(calc)            | 3.6                 | 3.6               | 1.625             | 3300   | 60     | 8       |
|        | 26                  | 75  |                  | 4+5=9         | TrioTim         | Siemens | 3              | 3                               | 3.6               | 0.625             | 4000   | 101    | 3       | 0/100/400<br>/800/1600(calc)            | 3.6                 | 3.6               | 1.625             | 3300   | 60     | 8       |
|        | 27                  | 70  |                  | 4+3=7         | TrioTim         | Siemens | 3              | 3                               | 3.6               | 0.625             | 4000   | 101    | 3       | 0/100/400<br>/800/1600(calc)            | 3.6                 | 3.6               | 1.625             | 3300   | 60     | 8       |
|        | 28                  | 74  |                  | 3+4=7         | Verio           | Siemens | 3              | 4                               | 4                 | 0.688             | 4000   | 111    | 2       | 0/100<br>/800/1400                      | 3.6                 | 3.6               | 1.742             | 3300   | 60     | 8       |

tse = turbo spin echo  
 TR= repetition time  
 TE= echo time  
 NoA= number of averages

ep= echoplanar  
 spair = spectral attenuated inversion recovery  
 (calc)= extrapolated value (not measured)
