# Supplementary material for: Impact of androgen deprivation therapy on apparent diffusion coefficient and T2w MRI for histogram and texture analysis with respect to focal radiotherapy of prostate cancer
Source: PubMed Central journal article supplement (PMC6488548; doi:10.1007/s00066-018-1402-3), 2018-11-26
Supplement: 66_2018_1402_MOESM2_ESM.pdf [file 66_2018_1402_MOESM2_ESM.pdf]

| Table S2       |         | no-ADT                               | ADT                                  |
|----------------|---------|--------------------------------------|--------------------------------------|
| age [years]    |         | <b>70±7</b>                          | <b>71±6</b>                          |
| PSA<br>[ng/ml] | initial | <b>23±24</b> (excl. one outlier>200) | <b>21±25</b> (excl. one outlier>200) |
|                | nadir*  | <b>0.02 (0.00; 0.13)</b>             | <b>0.12 (0.05; 0.30)</b>             |
| Gleason Score  | total   | <b>7.6±1.0</b>                       | <b>7.6±1.0</b>                       |
|                | GS 1    | 3.6±0.6                              | 3.8±0.6                              |
|                | GS 2    | 4.0±0.7                              | 3.8±0.7                              |
| Volume [ccm]   | lesion  | <b>1.8 (0.7; 7.9)</b>                | <b>1.3 (0.4; 4.8)</b>                |
|                | PZ      | <b>7 (7; 17)</b>                     | <b>9 (6; 13)</b>                     |
|                | CG      | <b>23 (18; 40)</b>                   | <b>16 (13; 23)</b>                   |

**Table S2** Characteristic parameters of the two patient sub-groups. With exception of the PSA nadir, none of the parameters differed significantly in between patient subgroups. Mean±SD is given for normal distributed parameters, median (1<sup>st</sup> quartile; 3<sup>rd</sup> quartile) for non-normal distributed ones. \* indicates significant difference (p<0.05)
