# Supplementary material for: Impact of androgen deprivation therapy on apparent diffusion coefficient and T2w MRI for histogram and texture analysis with respect to focal radiotherapy of prostate cancer
Source: PubMed Central journal article supplement (PMC6488548; doi:10.1007/s00066-018-1402-3), 2018-11-26

Figure S1 The decision tree diagrams for both patient groups and both healthy tissue ROIs.

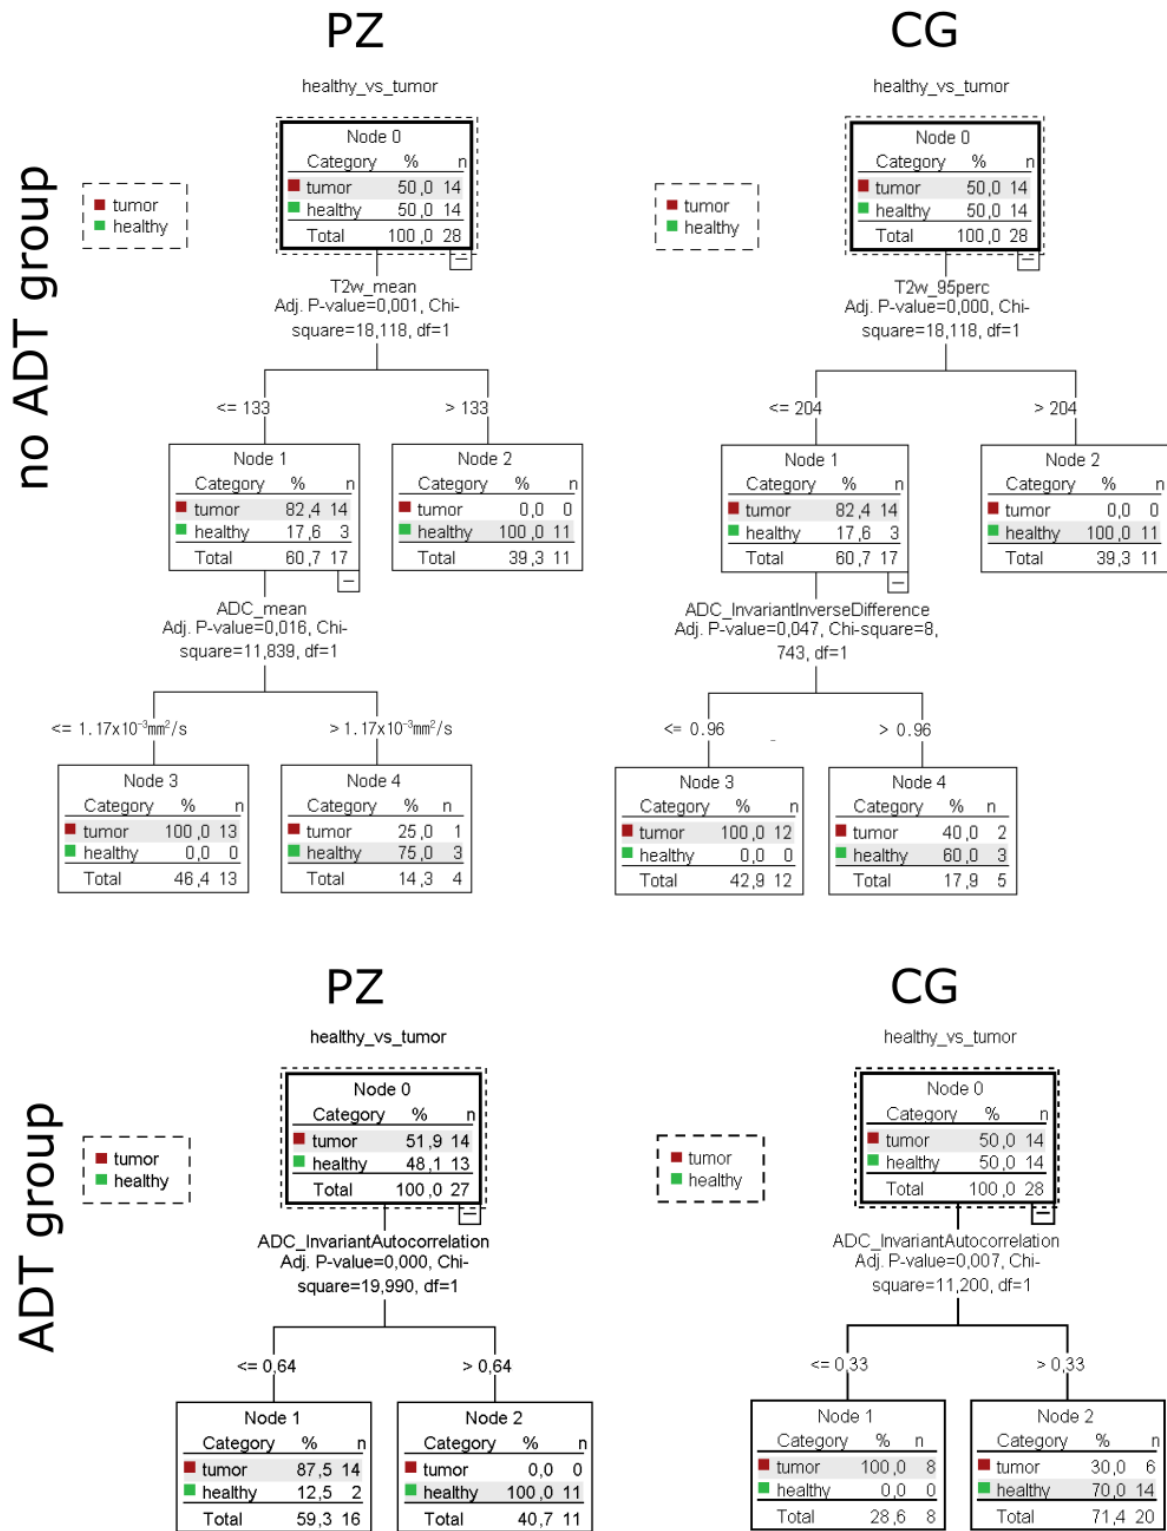

Supplement: 66_2018_1402_MOESM3_ESM.pdf [file 66_2018_1402_MOESM3_ESM.pdf]
